# Supplementary material
Source: publisher site journal article supplement (https://study.sagepub.com/sites/default/files/02%20Bloomberg%203e%20Appendix%20G.pdf)
Supplement: Supplementary file 1 [file 02%20Bloomberg%203e%20Appendix%20G.pdf]

## Appendix G. Sample Participant Demographics Matrix

| Participant Code | Pseudonym | Years in Doctoral Program | Program Concentration/<br>Discipline | Gender                      | Age |
|------------------|-----------|---------------------------|--------------------------------------|-----------------------------|-----|
| 1:EF106C         | Mollie    | 6                         | Education                            | F                           | 36  |
| 2:EF112G         | Hank      | Inactive                  | Political Sci.                       | M                           | 51  |
| 3:EF114G         | Morris    | 7                         | Org. Psy.                            | M                           | 70  |
| 4:EF114C         | Debbie    | Inactive                  | Art Education                        | F                           | 43  |
| 5:EF120G         | Doris     | Inactive                  | Ed.-Admin.                           | F                           | 47  |
| 6:EF202w         | Anthony   | 5                         | Education                            | M                           | 38  |
| 7:EF207C         | Anne      | 7                         | Education                            | F                           | 54  |
| 8:EF210C         | Brent     | 6                         | Teacher-Ed.                          | F                           | 35  |
| 9:EF213C         | Angela    | Inactive                  | Political Sci.                       | F                           | 49  |
| 10:A102G         | Jane      | 8                         | Education                            | F                           | 49  |
| 11:A201C         | Brad      | Inactive                  | Political Sci.                       | M                           | 46  |
| 12:A210C         | Dexter    | 5                         | Org. Psy.                            | M                           | 37  |
| 13:B01G          | Frank     | Inactive                  | Org. Psy.                            | M                           | 49  |
| 14:C103G         | Sally     | 5                         | Education                            | M                           | 31  |
| 15:C104C         | Shana     | 8                         | Nursing Ed.                          | F                           | 52  |
| 16:C113W         | Lin       | 7                         | Education                            | F                           | 46  |
| 17:D01C          | Carin     | 9                         | Ed.-Admin.                           | F                           | 47  |
| 18:D05G          | Fay       | 8                         | Nursing Ed.                          | F                           | 39  |
| 19:D07w          | Connie    | 6                         | Psychology                           | F                           | 41  |
| 20:G01C          | Julia     | Inactive                  | Psychology                           | F                           | 49  |
| TOTAL<br>N = 20  |           |                           |                                      | F = 14 (70%)<br>M = 6 (30%) |     |
